# Supplementary material for: XGB Modeling Reveals Improvement of Compressive Strength of Cement-Based Composites with Addition of HPMC and Chitosan
Source: MDPI journal article supplement (doi:10.3390/ma17020374), 2024-01-11
Supplement: s1 [file s1]

## Supplementary

Table S1 shows the compressive strength of the samples in relation to the composition of the ceramic-based composites.

**Table S1.** Compressive strength of the samples in relation to the composition of the ceramic-based composites

| Compressive strength (MPa) | Degradation (day) | ZOL ( $\mu\text{M}$ ) | % GO | % cement | Cellulose phase | % citric acid | % cellulose | % chitosan | Ref. |
|----------------------------|-------------------|-----------------------|------|----------|-----------------|---------------|-------------|------------|------|
| 0.006                      | 1                 | 0                     | 0    | 0        | 0               | 3             | 8           | 0          | [1]  |
| 0.006                      | 3                 | 0                     | 0    | 0        | 0               | 3             | 8           | 0          | [1]  |
| 0.006                      | 5                 | 0                     | 0    | 0        | 0               | 3             | 8           | 0          | [1]  |
| 0.006                      | 7                 | 0                     | 0    | 0        | 0               | 3             | 8           | 0          | [1]  |
| 0.12                       | 14                | 0                     | 0    | 0        | 0               | 3             | 8           | 0          | [1]  |
| 0.006                      | 1                 | 0                     | 0    | 20       | 0               | 3             | 8           | 0          | [1]  |
| 0.006                      | 3                 | 0                     | 0    | 20       | 0               | 3             | 8           | 0          | [1]  |
| 0.006                      | 5                 | 0                     | 0    | 20       | 0               | 3             | 8           | 0          | [1]  |
| 0.006                      | 7                 | 0                     | 0    | 20       | 0               | 3             | 8           | 0          | [1]  |
| 0.12                       | 14                | 0                     | 0    | 20       | 0               | 3             | 8           | 0          | [1]  |
| 0.006                      | 1                 | 0                     | 0    | 30       | 0               | 3             | 8           | 0          | [1]  |
| 0.006                      | 3                 | 0                     | 0    | 30       | 0               | 3             | 8           | 0          | [1]  |
| 0.1                        | 5                 | 0                     | 0    | 30       | 0               | 3             | 8           | 0          | [1]  |
| 0.125                      | 7                 | 0                     | 0    | 30       | 0               | 3             | 8           | 0          | [1]  |
| 0.124                      | 14                | 0                     | 0    | 30       | 0               | 3             | 8           | 0          | [1]  |
| 0.024                      | 1                 | 0                     | 0    | 50       | 0               | 3             | 8           | 0          | [1]  |
| 0.03                       | 3                 | 0                     | 0    | 50       | 0               | 3             | 8           | 0          | [1]  |
| 0.125                      | 5                 | 0                     | 0    | 50       | 0               | 3             | 8           | 0          | [1]  |
| 0.63                       | 7                 | 0                     | 0    | 50       | 0               | 3             | 8           | 0          | [1]  |
| 0.65                       | 14                | 0                     | 0    | 50       | 0               | 3             | 8           | 0          | [1]  |
| 0.09                       | 0                 | 0                     | 0    | 50       | 0               | 3             | 8           | 0          | [20] |
| 0.2                        | 0                 | 0                     | 0.5  | 50       | 0               | 3             | 8           | 0          | [20] |
| 0.16                       | 0                 | 0                     | 1    | 50       | 0               | 3             | 8           | 0          | [20] |
| 0.16                       | 0                 | 0                     | 1.5  | 50       | 0               | 3             | 8           | 0          | [20] |
| 0.1                        | 0                 | 0                     | 2    | 50       | 0               | 3             | 8           | 0          | [20] |
| 0.02                       | 0                 | 0                     | 0    | 50       | 0               | 3             | 8           | 0          | [26] |
| 0.1                        | 0                 | 0.5                   | 0    | 50       | 0               | 3             | 8           | 0          | [26] |
| 1                          | 0                 | 5                     | 0    | 50       | 0               | 3             | 8           | 0          | [26] |
| 1.4                        | 0                 | 0                     | 1.5  | 50       | 0               | 3             | 8           | 0          | [26] |
| 1                          | 0                 | 0.5                   | 1.5  | 50       | 0               | 3             | 8           | 0          | [26] |
| 0.8                        | 0                 | 5                     | 1.5  | 50       | 0               | 3             | 8           | 0          | [26] |
| 1.7                        | 0                 | 0                     | 0    | 62.5     | 1               | 20            | 2           | 0          | [7]  |
| 1.5                        | 0                 | 0                     | 0    | 65       | 1               | 20            | 2           | 0          | [7]  |
| 0.9                        | 0                 | 0                     | 0    | 67.5     | 1               | 20            | 2           | 0          | [7]  |
| 1.3                        | 0                 | 0                     | 0    | 70       | 1               | 20            | 2           | 0          | [25] |
| 1.3                        | 0                 | 0                     | 0.5  | 70       | 1               | 20            | 2           | 0          | [25] |

|      |    |   |   |    |   |    |   |   |      |
|------|----|---|---|----|---|----|---|---|------|
| 1.8  | 0  | 0 | 1 | 70 | 1 | 20 | 2 | 0 | [25] |
| 1.1  | 0  | 0 | 2 | 70 | 1 | 20 | 2 | 0 | [25] |
| 2    | 0  | 0 | 0 | 64 | 3 | 20 | 0 | 2 | [10] |
| 6    | 1  | 0 | 0 | 64 | 3 | 20 | 0 | 2 | [10] |
| 9    | 3  | 0 | 0 | 64 | 3 | 20 | 0 | 2 | [10] |
| 11   | 7  | 0 | 0 | 64 | 3 | 20 | 0 | 2 | [10] |
| 11   | 14 | 0 | 0 | 64 | 3 | 20 | 0 | 2 | [10] |
| 8    | 0  | 0 | 0 | 64 | 3 | 40 | 0 | 2 | [10] |
| 10   | 1  | 0 | 0 | 64 | 3 | 40 | 0 | 2 | [10] |
| 13   | 3  | 0 | 0 | 64 | 3 | 40 | 0 | 2 | [10] |
| 14   | 7  | 0 | 0 | 64 | 3 | 40 | 0 | 2 | [10] |
| 15   | 14 | 0 | 0 | 64 | 3 | 40 | 0 | 2 | [10] |
| 9    | 0  | 0 | 0 | 64 | 3 | 20 | 2 | 2 | [10] |
| 12   | 1  | 0 | 0 | 64 | 3 | 20 | 2 | 2 | [10] |
| 14   | 3  | 0 | 0 | 64 | 3 | 20 | 2 | 2 | [10] |
| 16   | 7  | 0 | 0 | 64 | 3 | 20 | 2 | 2 | [10] |
| 16.5 | 14 | 0 | 0 | 64 | 3 | 20 | 2 | 2 | [10] |
| 13   | 0  | 0 | 0 | 64 | 3 | 40 | 2 | 2 | [10] |
| 15   | 1  | 0 | 0 | 64 | 3 | 40 | 2 | 2 | [10] |
| 15   | 3  | 0 | 0 | 64 | 3 | 40 | 2 | 2 | [10] |
| 17   | 7  | 0 | 0 | 64 | 3 | 40 | 2 | 2 | [10] |
| 18   | 14 | 0 | 0 | 64 | 3 | 40 | 2 | 2 | [10] |
| 14   | 0  | 0 | 0 | 64 | 3 | 20 | 4 | 2 | [10] |
| 16   | 1  | 0 | 0 | 64 | 3 | 20 | 4 | 2 | [10] |
| 17   | 3  | 0 | 0 | 64 | 3 | 20 | 4 | 2 | [10] |
| 18   | 7  | 0 | 0 | 64 | 3 | 20 | 4 | 2 | [10] |
| 18.5 | 14 | 0 | 0 | 64 | 3 | 20 | 4 | 2 | [10] |
| 18   | 0  | 0 | 0 | 64 | 3 | 40 | 4 | 2 | [10] |
| 18   | 1  | 0 | 0 | 64 | 3 | 40 | 4 | 2 | [10] |
| 21   | 3  | 0 | 0 | 64 | 3 | 40 | 4 | 2 | [10] |
| 20.5 | 7  | 0 | 0 | 64 | 3 | 40 | 4 | 2 | [10] |
| 22   | 14 | 0 | 0 | 64 | 3 | 40 | 4 | 2 | [10] |

Figure S1 shows the compressive strength of predicted and experimental MC loaded samples versus wt% of GO.

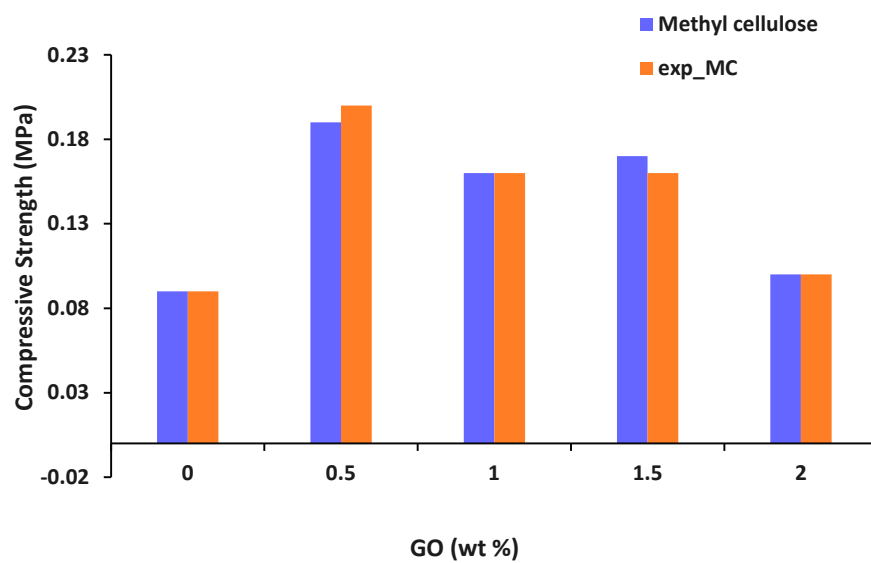

**Figure S1.** Compressive strength of predicted and experimental MC loaded samples versus wt% of GO (cement phase=50%, % cellulose=4, % chitosan=0).
